# Supplementary material for: Enhancing the strain sensitivity of CoFe2O4at low magnetic fields without affecting the magnetostriction coefficient by substitution of small amounts of Mg for Fe
Source: Royal Society of Chemistry journal article supplement (doi:10.1039/c6cp00369a), 2016-01-01
Supplement: c6cp00369a1.pdf [file c6cp00369a1.pdf]

## Supplementary Information

### Enhancing the strain sensitivity of $\text{CoFe}_2\text{O}_4$ at low magnetic fields without affecting the magnetostriction coefficient by substitution of small amounts of Mg for Fe

P. N. Anantharamaiah<sup>1,2</sup> and P. A. Joy<sup>1,2,\*</sup>

<sup>1</sup> Physical and Materials Chemistry Division, CSIR-National Chemical Laboratory (CSIR-NCL), Pune 411008, India

<sup>2</sup> Academy of Scientific and Innovative Research (AcSIR), CSIR-NCL, Pune 411008, India

**Table S1** The Rietveld refinement parameters, weighted profile factor ( $R_{\text{wp}}$ ), profile factor ( $R_{\text{p}}$ ), goodness of fit ( $\chi^2$ ), and oxygen positional parameter ( $u$ )

| <b>x in<br/><math>\text{CoMg}_x\text{Fe}_{2-x}\text{O}_4</math></b> | <b><math>R_{\text{wp}}</math><br/>(%)</b> | <b><math>R_{\text{p}}</math><br/>(%)</b> | <b><math>\chi^2</math></b> | <b><math>u</math><br/>(Å)</b> |
|---------------------------------------------------------------------|-------------------------------------------|------------------------------------------|----------------------------|-------------------------------|
| 0.0                                                                 | 3.2                                       | 2.4                                      | 1.4                        | 0.382                         |
| 0.025                                                               | 2.5                                       | 1.9                                      | 1.2                        | 0.380                         |
| 0.05                                                                | 2.4                                       | 2.0                                      | 1.1                        | 0.382                         |
| 0.10                                                                | 2.7                                       | 2.1                                      | 1.1                        | 0.383                         |
| 0.15                                                                | 2.9                                       | 2.2                                      | 1.3                        | 0.379                         |
| 0.20                                                                | 3.2                                       | 2.5                                      | 1.5                        | 0.381                         |

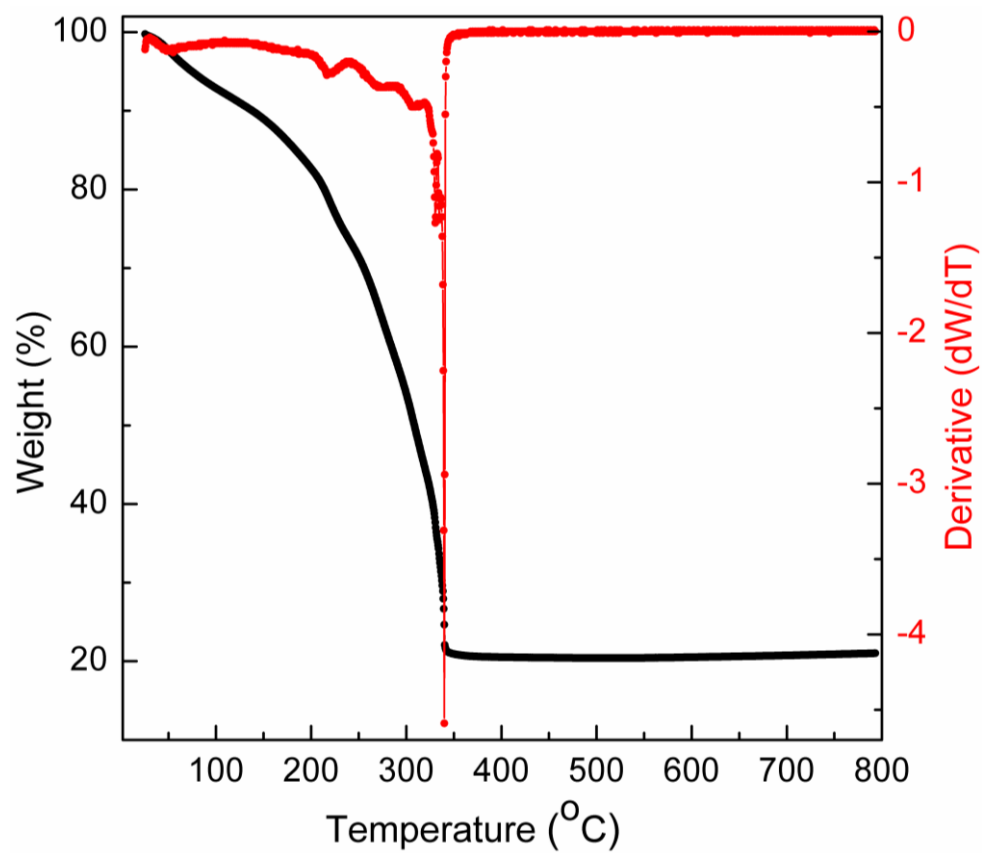

**Fig. S1** Thermogravimetric analysis (black) and the corresponding derivative (red) curves of dried precursor for cobalt ferrite.

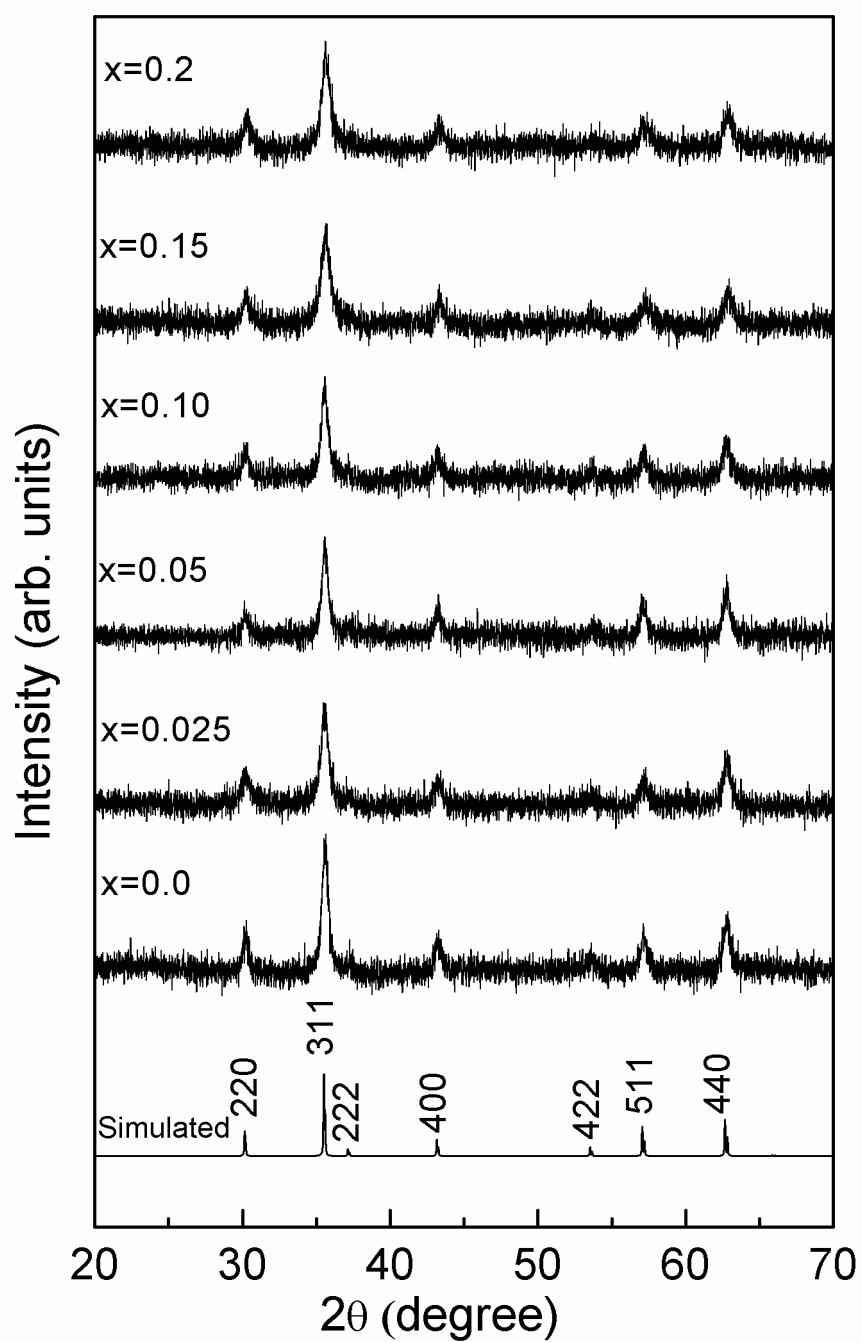

**Fig. S2** X-ray diffraction patterns of the calcined powders of  $\text{CoMg}_x\text{Fe}_{2-x}\text{O}_4$ . The simulated pattern of  $\text{CoFe}_2\text{O}_4$  is shown at the bottom.

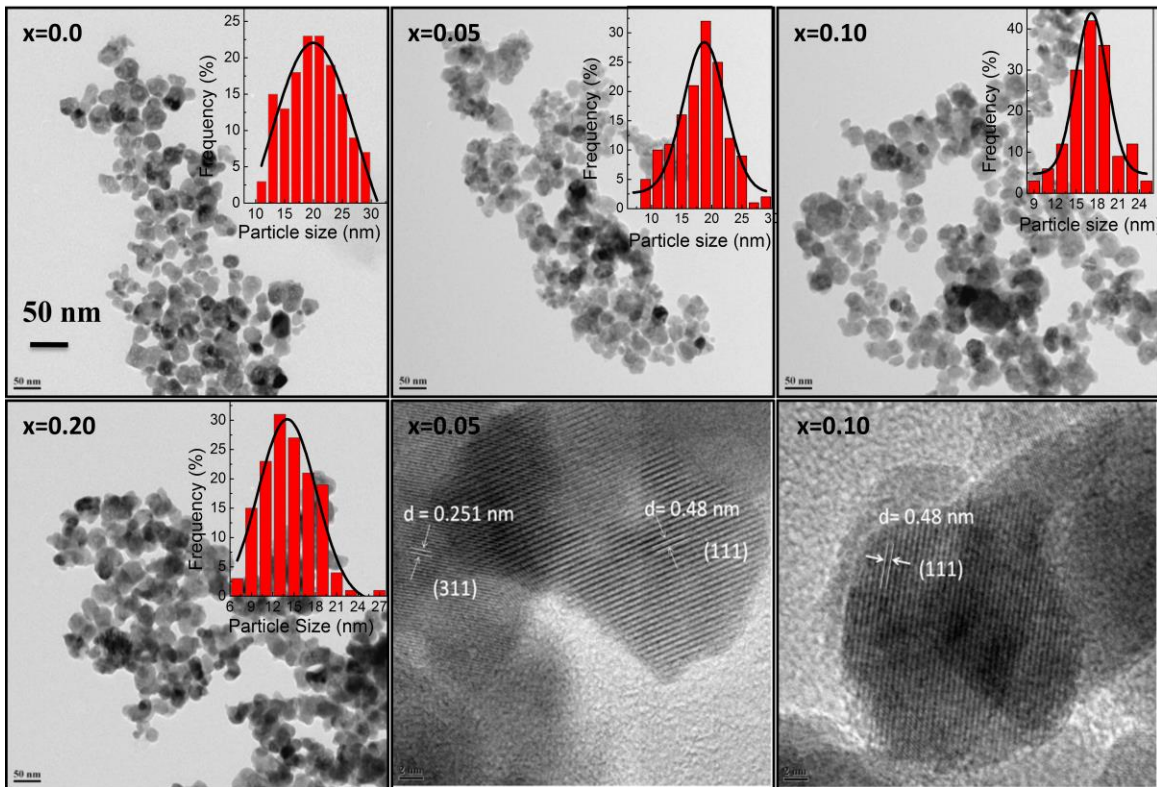

**Fig. S3** TEM images of the calcined samples of  $\text{CoMg}_x\text{Fe}_{2-x}\text{O}_4$ . The particle size histograms are shown in the insets.

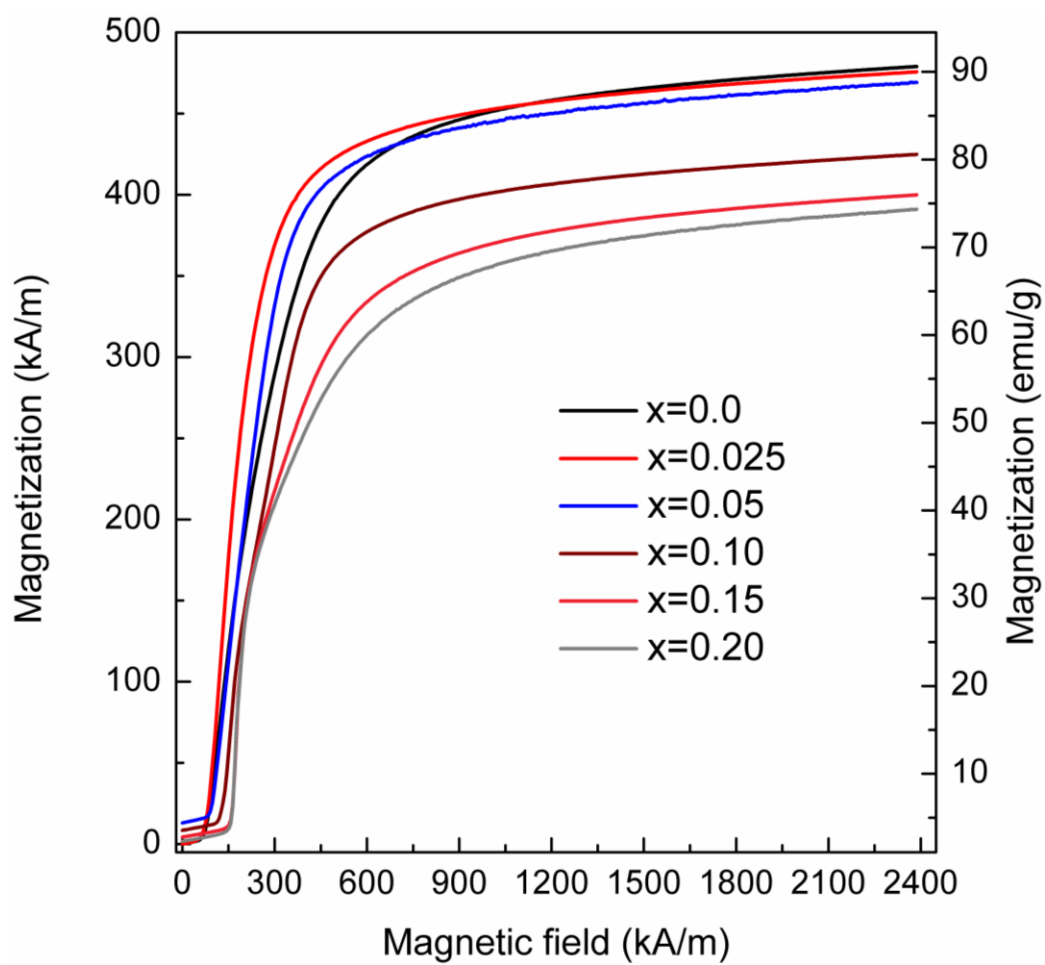

**Fig. S4** Initial magnetization curves of the sintered  $\text{CoMg}_x\text{Fe}_{2-x}\text{O}_4$  samples measured at 5K.

## Magnetocrystalline anisotropy

According to law of approach to saturation (LoA), the high field regions ( $H \gg H_{\text{coercivity}}$ ) of M-H loop can be described by the equation

$$M = M_s \left[ 1 - \frac{8}{105} \frac{K_1^2}{\mu_0^2 H^2} \right] + kH$$

where,  $M$  is the magnetization in kA/m,  $M_s$  is the saturation magnetization in kA/m,  $H$  is the applied magnetic field in kA/m,  $K_1$  is the first order cubic magnetocrystalline anisotropy coefficient in  $\text{J/m}^3$ ,  $\mu_0$  is the permeability of free space ( $1.257 \times 10^{-6} \text{ mkg s}^{-2} \text{ A}^{-2}$ ) and  $kH$  is the forced magnetization coefficient that describes the linear increase in the spontaneous magnetization at high fields and at higher temperature regions. The constant  $8/105$  is specific to cubic anisotropy of randomly oriented polycrystalline materials. At temperature above 150 K, data from the field region  $\mu_0 H \geq 1\text{T}$  can be fitted to the above equation to determine the values of parameters  $M_s$ ,  $K_1$  and  $k$ . At room temperature, forced magnetization term  $kH$  is set to be zero ( $k=0$ ), since it has to be fitted at high temperature and high field region and therefore,  $M_s$  and  $K_1$  are only the fitting parameters at room temperature.

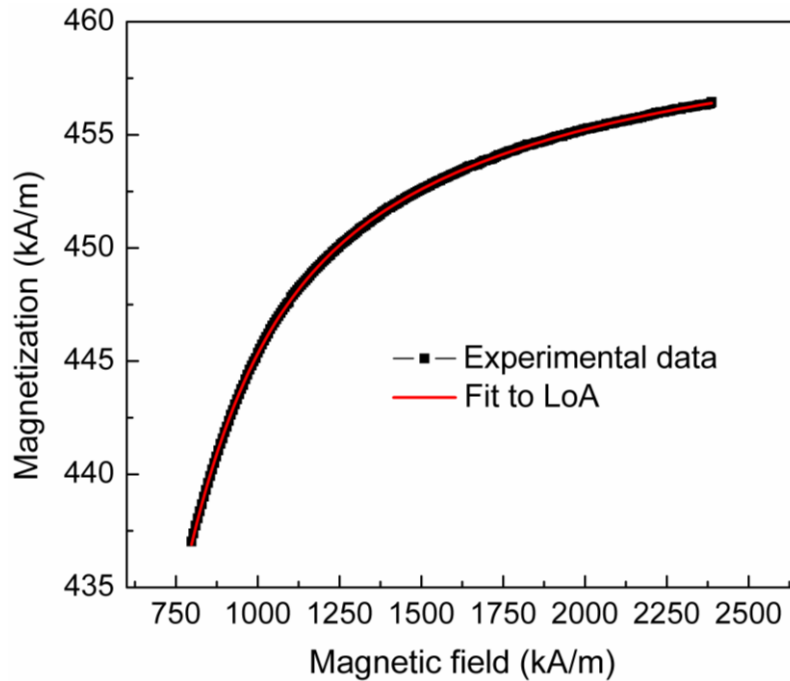

**Fig. S5** Fit of the high field magnetization of sintered cobalt ferrite at room temperature, using the law of approach to saturation.
